# Supplementary material for: Hidradenitis suppurativa as a potential risk factor of periodontitis: a multi-center, propensity-score-matched cohort study
Source: PubMed Central journal article supplement (PMC11008474; doi:10.7150/ijms.93178), 2024-03-25
Supplement: ijmsv21p0874s1.pdf [file ijmsv21p0874s1.pdf]

## Supplementary Files

### Supplementary Tables

**Table S1.** Utilized administrative codes in the current study

| <b>Description</b>                           | <b>ICD-10-CM codes<sup>a</sup></b> |
|----------------------------------------------|------------------------------------|
| Hidradenitis Suppurativa                     | L73.2                              |
| Neoplasms                                    | C00-D49                            |
| Periodontitis                                | K05.3                              |
| Gingivitis                                   | K05.1                              |
| Diabetes mellitus                            | E08-E13                            |
| Hypertension                                 | I10                                |
| Socioeconomic and psychosocial circumstances | Z55-Z65                            |
| Substance abuse                              | F10-F19                            |
| Menopause                                    | N95                                |
| Encounter for health examination             | Z00                                |
| <b>Medications</b>                           | <b>RxNorm/ATC codes</b>            |
| Fluoxetine                                   | RxNorm:4493                        |
| Venlafaxine                                  | RxNorm:39786                       |
| Nifedipine                                   | RxNorm:7417                        |
| Amlodipine                                   | RxNorm:17767                       |
| Mycophenolate                                | RxNorm:265323                      |
| Tacrolimus                                   | RxNorm:42316                       |
| Tumor necrotizing factor alpha inhibitors    | ATC code: L04AB                    |

|             |                 |
|-------------|-----------------|
| Secukinumab | RxNorm:1599788  |
| Brodalumab  | RxNorm: 1872251 |
| Tofacitinib | RxNorm:1357536  |
| Baricitinib | RxNorm: 2047232 |

<sup>a</sup>ICD-10-CM: International Classification of Diseases, Tenth Revision, Clinical Modification

**Table S2.** Sensitivity analysis: risk of periodontitis in HS patients based on different covariate matching models, with 5-year follow up

| Outcomes      | Hazard ratio (95% Confidence interval) |                         |                         |                         |                         |                         |                         |
|---------------|----------------------------------------|-------------------------|-------------------------|-------------------------|-------------------------|-------------------------|-------------------------|
|               | Crude                                  | Model 1 <sup>a</sup>    | Model 2 <sup>b</sup>    | Model 3 <sup>c</sup>    | Model 4 <sup>d</sup>    | Model 5 <sup>e</sup>    | Model 6 <sup>f</sup>    |
| Periodontitis | <b>3.24 (2.67,3.94)</b>                | <b>2.76 (1.89,4.03)</b> | <b>3.14 (2.12,4.66)</b> | <b>1.62 (1.19,2.21)</b> | <b>1.78 (1.30,2.43)</b> | <b>1.70 (1.25,2.31)</b> | <b>1.67 (1.23,2.27)</b> |

<sup>a</sup> Propensity score matching was performed on age at index and sex

<sup>b</sup> Propensity score matching was performed on age at index and sex, socioeconomic status and substance use status

<sup>c</sup> Propensity score matching was performed on age at index, sex, race, body mass index, status of comorbidities (including diabetes mellitus, hypertension, hyperlipidemia, gingivitis), substance use status, medical utilization status, lab data and socioeconomic status and comedication status (antidepressants, calcium channel blockers and immunosuppressants)

<sup>d</sup> Propensity score matching was performed based on the same matching covariates as the main analysis in Table 2 + the use of TNF alpha inhibitors

<sup>e</sup> Propensity score matching was performed based on the same matching covariates as the main analysis in Table 2 + the use of Interleukin 17 inhibitors (secukinumab, brodalumab)

<sup>f</sup> Propensity score matching was performed based on the same matching covariates as the main analysis in Table 2 + the use of Janus kinase inhibitors (tofacitinib, baricitinib)

**Table S3.** Sensitivity analysis: risk of periodontitis with different wash-out periods <sup>a</sup>

| Outcomes      | Hazard ratio (95% Confidence interval) <sup>b</sup> |                         |                         |
|---------------|-----------------------------------------------------|-------------------------|-------------------------|
|               | 6 months                                            | 12 months               | 18 months               |
| Periodontitis | <b>1.71 (1.24,2.36)</b>                             | <b>1.65 (1.17,2.34)</b> | <b>1.70 (1.17,2.48)</b> |

<sup>a</sup> Incident events occurred within each wash-out period were excluded in the corresponding analysis, following up for 5 years after index date

<sup>b</sup> Propensity score matching was performed on age at index, sex, race, body mass index, status of comorbidities (including diabetes mellitus, hypertension, hyperlipidemia, gingivitis), substance use status, medical utilization status, lab data and socioeconomic status.

**Table S4.** Risk of periodontitis in HS patients, comparing with patients with psoriasis in 5-year follow up

| Outcomes      | HS cohort<br>(No. of event/ HS patient<br>amount in each subgroup) | Psoriasis cohort<br>(No. of event/ Psoriasis patient<br>amount in each subgroup) | Hazard ratio (95% Confidence interval) <sup>a,b</sup> |
|---------------|--------------------------------------------------------------------|----------------------------------------------------------------------------------|-------------------------------------------------------|
| Periodontitis | 89/43,226                                                          | 51/43,226                                                                        | <b>1.73 (1.23,2.44)</b>                               |

<sup>a</sup> Data present here were the value of follow up from 90 days after index date to the respective following up years.

<sup>b</sup> Propensity score matching was performed on age at index, sex, race, body mass index, status of comorbidities (including diabetes mellitus, hypertension, hyperlipidemia, gingivitis), substance use status, medical utilization status, lab data and socioeconomic status.
